# Supplementary material for: Terpene dispersion energy donor ligands in borane complexes
Source: Royal Society of Chemistry journal article supplement (doi:10.1039/d2cc04203g), 2022-01-01
Supplement: d2cc04203g1.pdf [file d2cc04203g1.pdf]

## Supporting information

# Terpene Dispersion Energy Donor Ligands in Borane Complexes

Kristian L. Mears<sup>[a]</sup>, Michelle A. Kutzleb<sup>[a]</sup>, Cary R. Stennett<sup>[a]</sup>, James C. Fettinger<sup>[a]</sup>, Derrick C. Kaseman<sup>[a†]</sup>, Ping Yu<sup>[a†]</sup>, Petra Vasko<sup>\*[b]</sup> and Philip P. Power<sup>\*[a]</sup>

**Abstract:** Structural characterization of the complex [B( $\beta$ -pinane)<sub>3</sub>] (**1**) reveals non-covalent H $\cdots$ H approaches that are consistent with the generation of London dispersion energies involving the  $\beta$ -pinane ligand frameworks. The homolytic fragmentations of **1**, and camphane and sabinane analogues ([B(camphane)<sub>3</sub>] (**2**) and [B(sabinane)<sub>3</sub>] (**3**)) were studied computationally. Isodesmic exchange results showed that London dispersion interactions are highly dependent on the terpene's stereochemistry, with the pinane framework providing the greatest dispersion free energy ( $\Delta G = -7.9$  kcal mol<sup>-1</sup>) with dispersion correction (GD3BJ) employed. PMe<sub>3</sub> was used to coordinate to [B( $\beta$ -pinane)<sub>3</sub>], giving the complex [Me<sub>3</sub>P-B( $\beta$ -pinane)<sub>3</sub>], which displayed a dynamic coordination-equilibrium in solution. The association process was found to be slightly endergonic at 302 K ( $\Delta G = +0.29$  kcal mol<sup>-1</sup>).

### Table of Contents

|                              |    |
|------------------------------|----|
| S1. Experimental Procedures  | 2  |
| S2. NMR Spectra              | 3  |
| S3. Van't Hoff Analysis      | 7  |
| S4. Crystallographic Details | 9  |
| S5. Computational Methods    | 10 |
| S6. References               | 26 |

## S1. Experimental Procedures

All manipulations were carried out using standard Schlenk-line and glovebox techniques under an inert atmosphere of argon or dinitrogen. A Vacuum Atmospheres OMNI-Lab glovebox was employed, operating at <0.1 ppm O<sub>2</sub> and <0.1 ppm H<sub>2</sub>O. Solvents were dried over activated alumina from an SPS (solvent purification system) based upon the Grubbs design and degassed before use. Glassware was dried in an oven overnight at 120 °C prior to use. NMR solvents including C<sub>6</sub>D<sub>6</sub> and PhMe-D<sub>8</sub> were dried over 3 Å molecular sieves and were freeze-pump thaw degassed thrice prior to use. [BH<sub>3</sub>•THF]<sup>[1]</sup> and complex 1, [B(b-pinane)<sub>3</sub>]<sup>[2]</sup> were synthesized by a modified literature procedure. b-pinene, camphene and sabinene were procured from Oakwood Chemicals and were purified by distillation before use. NMR spectra (<sup>1</sup>H, <sup>11</sup>B, <sup>13</sup>C, <sup>31</sup>P and VT-NMR) were recorded on either a 400 MHz Bruker Nanobay AVIIIHD or a 500 MHz Bruker Avance DRX spectrometers and values were recorded in ppm. Data were processed using MNova/Bruker TopSpin software.

**Synthesis of complex 1, [B(β-pinane)<sub>3</sub>]:** In a J-Young's ampoule attached to a Schlenk line, b-pinene (1.15 mL, 21.1 mmol) was dissolved in THF and cooled to -78 °C. BH<sub>3</sub>•THF (7.3 mL, 7.33 mmol) was added dropwise to the cooled mixture. The resulting mixture was allowed to warm to room temperature and stirred for 12 hours. After this time, all volatiles were removed yielding a white solid. The solid was taken up in warm hexane, filtered, and the filtrate cooled to -30 °C yielding the product (1) as colorless crystalline blocks, suitable for single crystal X-ray diffraction. Yield = 2.84 g (91%). All spectra match with those previously reported. <sup>1</sup>H NMR (400 MHz, C<sub>6</sub>D<sub>6</sub>, 298 K) δ (ppm): 2.64–2.61 (m, 1H), 2.39–2.36 (m, 1H), 2.11–2.06 (m, 1H), 2.01–1.06 (m, 1H), 1.93–1.86 (m, 2H), 1.80–1.78 (m, 1H), 1.64–1.60 (m, 1H), 1.52–1.42 (m, 2H), 1.23 (s, 3H), 1.16 (s, 3H), 0.97 (d, *J*<sub>HH</sub> = 9.5 Hz, 1H). <sup>13</sup>C{<sup>1</sup>H} NMR δ (ppm): 49.6, 41.7, 39.0, 38.9, 34.8, 28.6, 27.2, 25.7, 23.6. <sup>11</sup>B NMR (160 MHz, PhMe-D<sub>8</sub>) δ (ppm): 89.2.

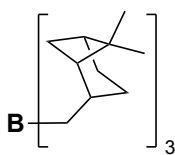

**Synthesis of complex 2, [B(camphane)<sub>3</sub>]:** In a J-Young's ampoule attached to a Schlenk line, camphene (3.00 g, 22.0 mmol) was dissolved in THF and cooled to -78 °C. BH<sub>3</sub>•THF (7.3 mL, 7.34 mmol) was added dropwise to the cooled mixture. The resulting mixture was allowed to warm to room temperature and stirred for 12 hours. After this time, all volatiles were removed yielding a colorless gel (2.37 g, yield based on 2 = 85%). The gel remained despite many rounds of titration in hexane. <sup>1</sup>H, <sup>13</sup>C NMR spectroscopy indicated a mixture of products. <sup>11</sup>B NMR showed some formation of the tri-substituted borane (2) with a chemical shift of δ = 87.8 ppm in PhMe-D<sub>8</sub> at 298 K.

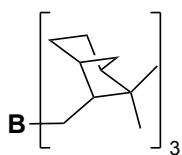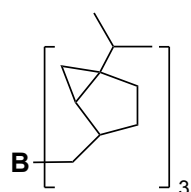

**Synthesis of complex 3, [B(sabinene)<sub>3</sub>]:** In a J-Young's ampoule attached to a Schlenk line, sabinene (3.00, 22.0 mmol) was dissolved in THF and cooled to -78 °C. BH<sub>3</sub>•THF (7.3 mL, 7.33 mmol) was added dropwise to the cooled mixture. The resulting mixture was allowed to warm to room temperature and stirred for 12 hours. After this time, all volatiles were removed yielding a colorless oil (2.12 g, yield based on 3 = 68%). The oil remained despite many rounds of titration in hexane. <sup>1</sup>H, <sup>13</sup>C NMR spectroscopy indicated a mixture of products. <sup>11</sup>B NMR showed some formation of the tri-substituted borane (3) with a chemical shift of δ = 87.5 ppm in PhMe-D<sub>8</sub> at 298 K.

**Synthesis of complex 4, [Me<sub>3</sub>P-B(β-pinane)<sub>3</sub>]:** In a J-Young's ampoule attached to a Schlenk line, [B(β-pinane)<sub>3</sub>] (200 mg, 0.47 mmol) was dissolved in toluene. PMe<sub>3</sub> (0.03 mL, 0.47 mmol) was added to the cooled mixture. The resulting mixture was stirred for 12 hours and all volatiles removed yielding a white solid. The solid was taken up in warm pentane, filtered, and the filtrate cooled to -30 °C yielding the product (4) as colorless crystalline blocks, suitable for single crystal X-ray diffraction.

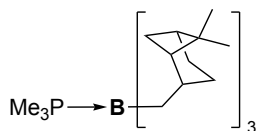

Yield = 152 mg (0.30 mmol, 64%). <sup>1</sup>H NMR (400 MHz, PhMe-D<sub>8</sub>, 298 K) δ (ppm): 2.37–2.32 (m, 1H), 2.18–2.19 (m, 2H), 2.06–2.01 (m, 1H), 1.94–1.86 (m, 3H), 1.61–1.54 (m, 1H), 1.27 (s, 3H), 1.21 (s, 3H), 0.97 (d, *J*<sub>H-H</sub> = 9.3 Hz, 1H), 0.79 (d, *J*<sub>PH</sub> = 3.4 Hz, 3H, coordinated PMe<sub>3</sub>), 0.78 (s, 3H, uncoordinated PMe<sub>3</sub>). <sup>13</sup>C{<sup>1</sup>H} NMR: δ (ppm) 51.3, 42.5, 41.0, 39.5, 34.6, 29.2, 28.1, 28.0, 24.4, (d, *J*<sub>CP</sub> = 4.9 Hz, 15.5). <sup>11</sup>B NMR (160 MHz, PhMe-D<sub>8</sub>, 209 K) δ (ppm): -14.5. <sup>31</sup>P NMR (500 MHz, PhMe-D<sub>8</sub>) δ (ppm): -9.5. Melting point: 80–82 °C.

## S2. NMR Spectra

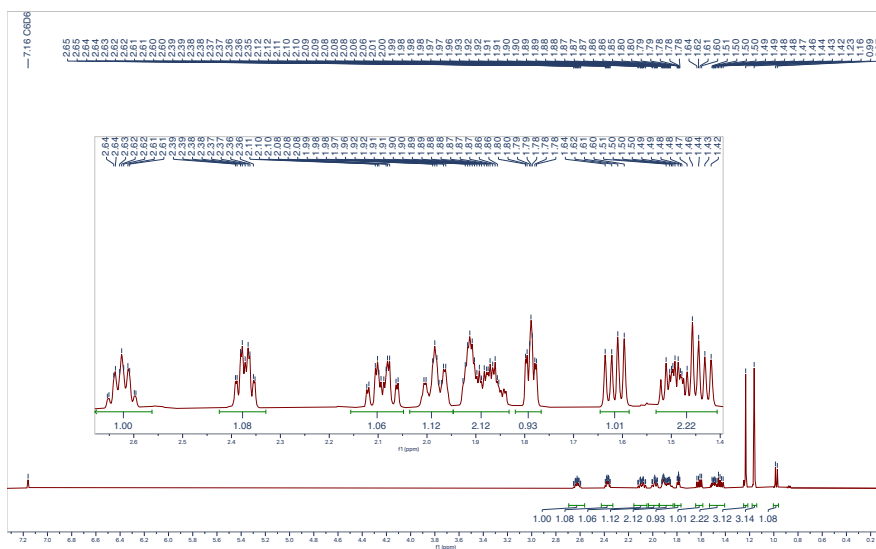

Fig S1.  $^1\text{H}$  NMR spectrum of complex **1** in  $\text{C}_6\text{D}_6$  at 298 K.

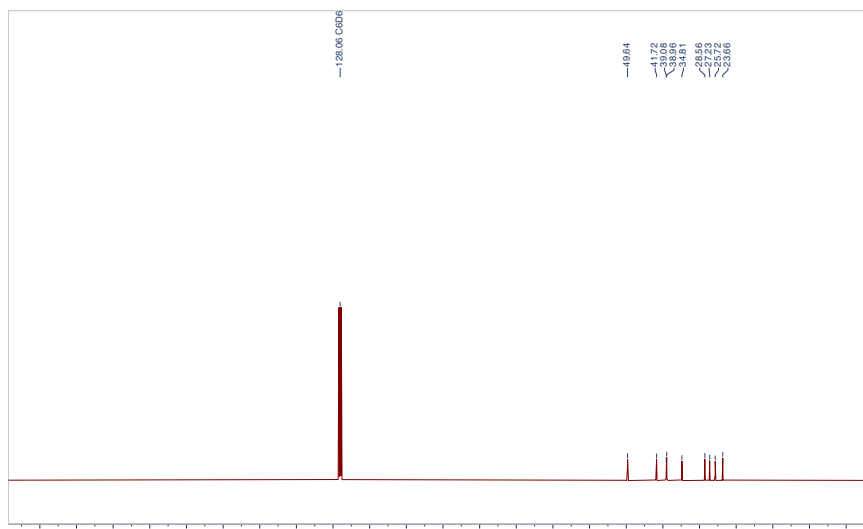

Fig S2.  $^{13}\text{C}\{^1\text{H}\}$  NMR spectrum of complex **1** in  $\text{C}_6\text{D}_6$  at 298 K.

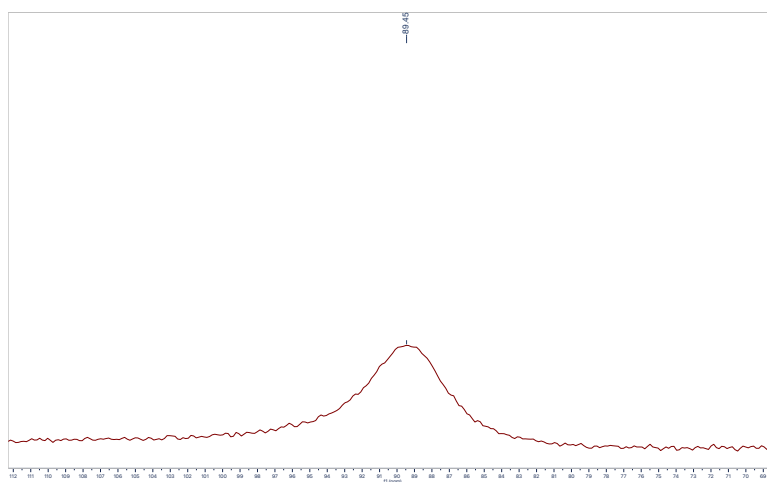

Fig S3.  $^{11}\text{B}$  NMR spectrum of complex **1** in  $\text{C}_6\text{D}_6$  at 298 K.



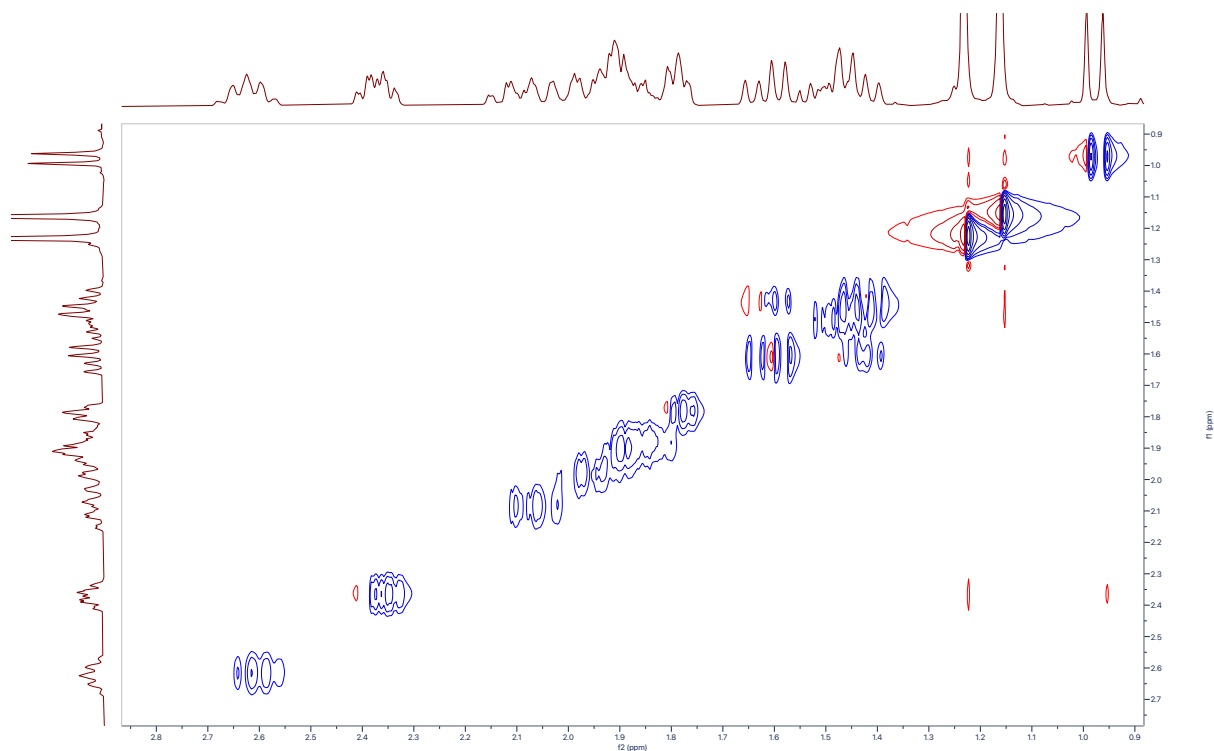

**Fig S7.** NOESY NMR spectrum of complex **1** in  $C_6D_6$  at 298 K.

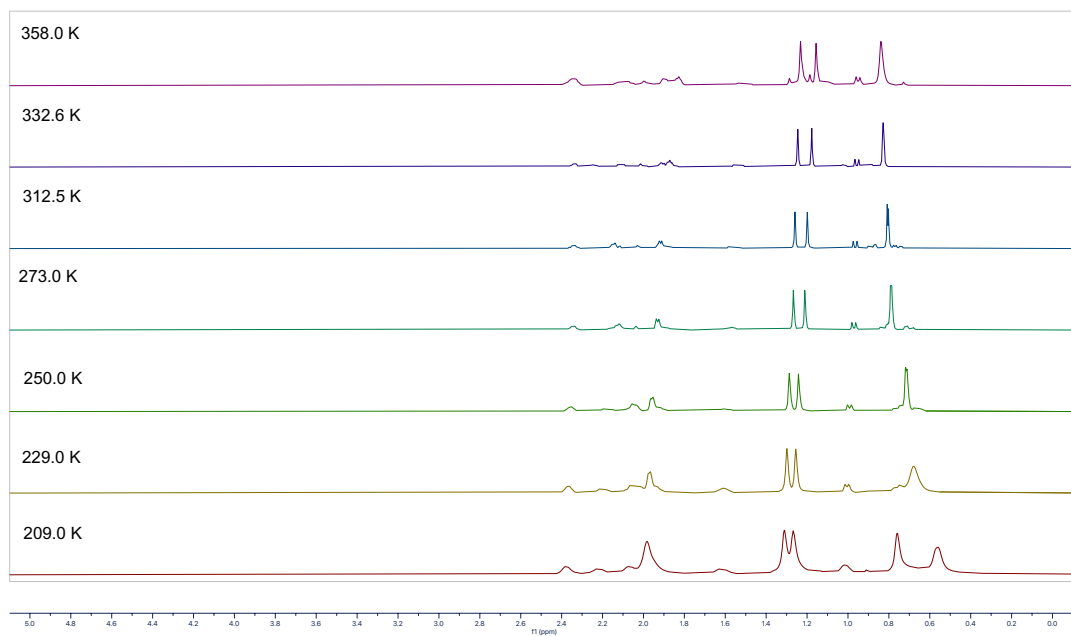

**Fig S8.** Variable temperature  $^1H$  NMR spectra of complex **4** in  $PhMe-D_8$ .

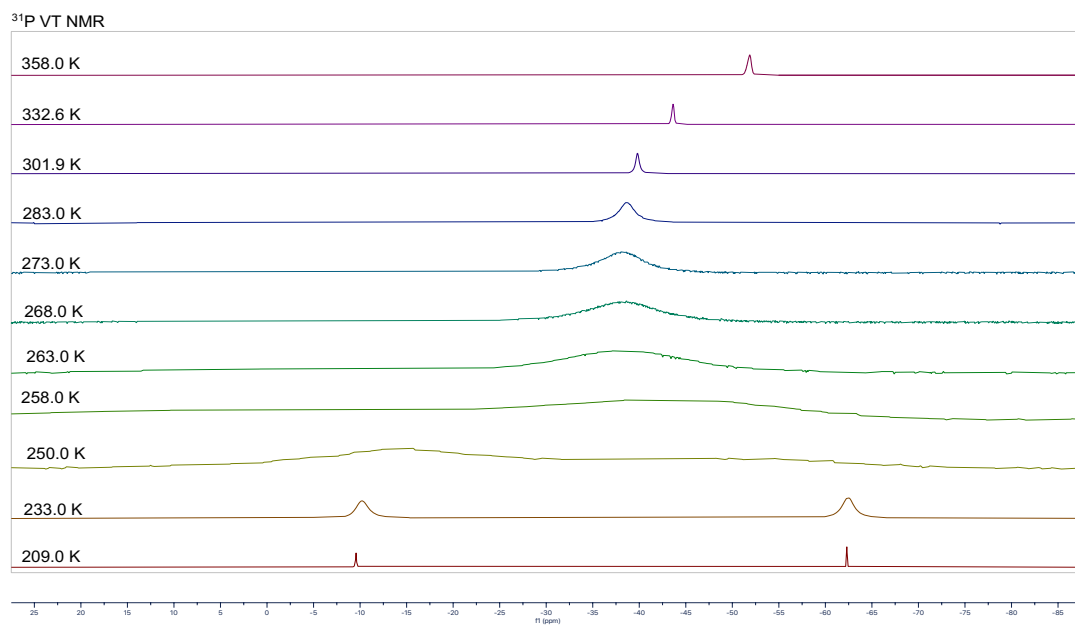

**Fig S9.** Variable temperature <sup>31</sup>P NMR spectra of complex **4** in PhMe-D<sub>8</sub>.<sup>[3]</sup>

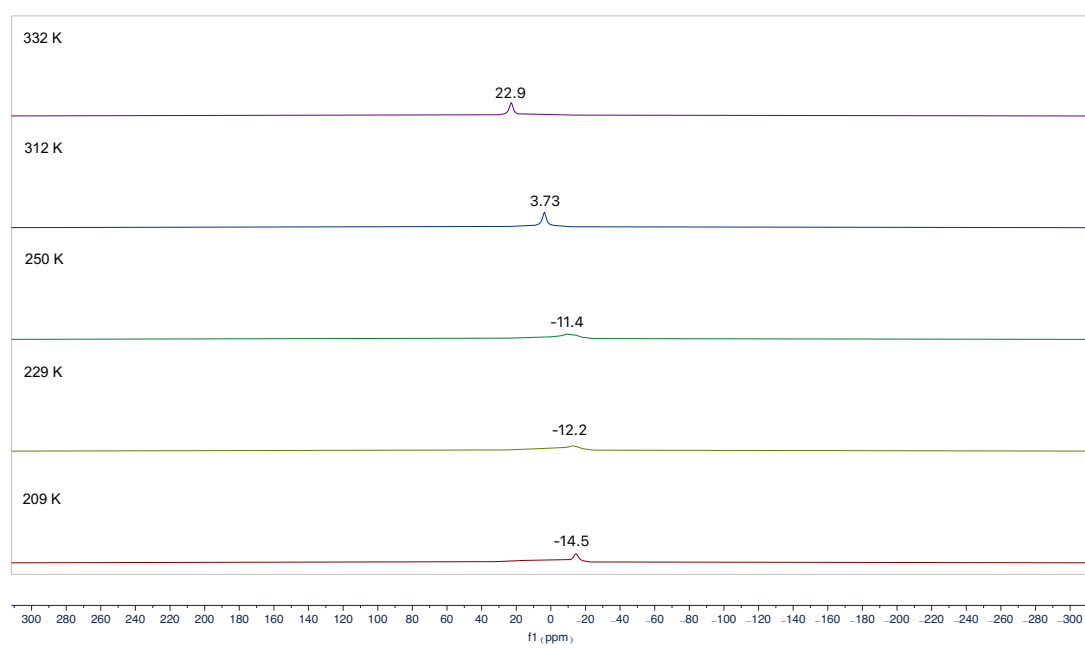

**Fig S10.** Variable temperature <sup>11</sup>B NMR spectra of complex **4** in PhMe-D<sub>8</sub>.

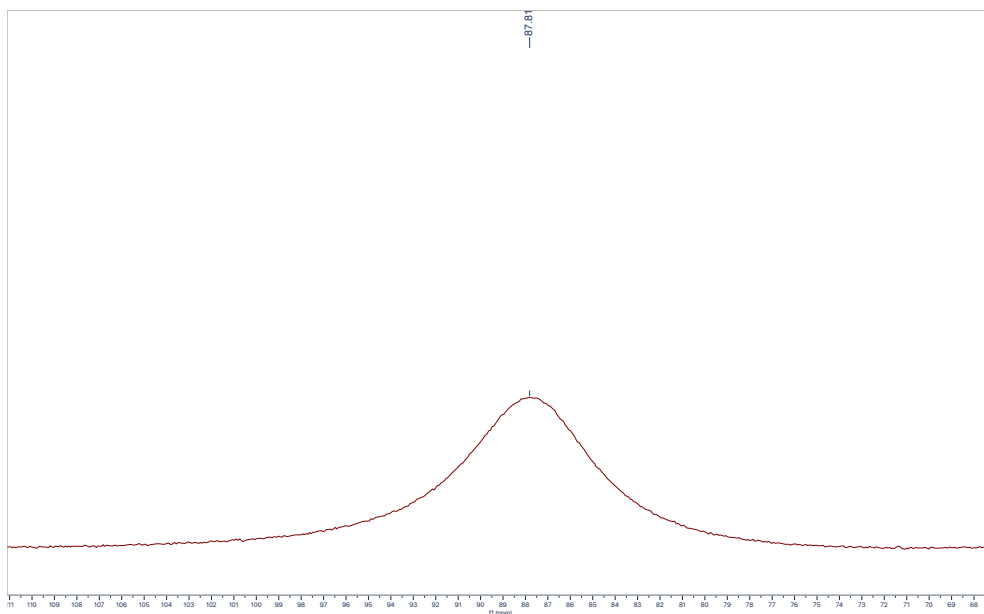

**Fig S11.**  $^{11}\text{B}$  NMR spectrum of complex **2** in PhMe- $\text{D}_8$  at 298 K.

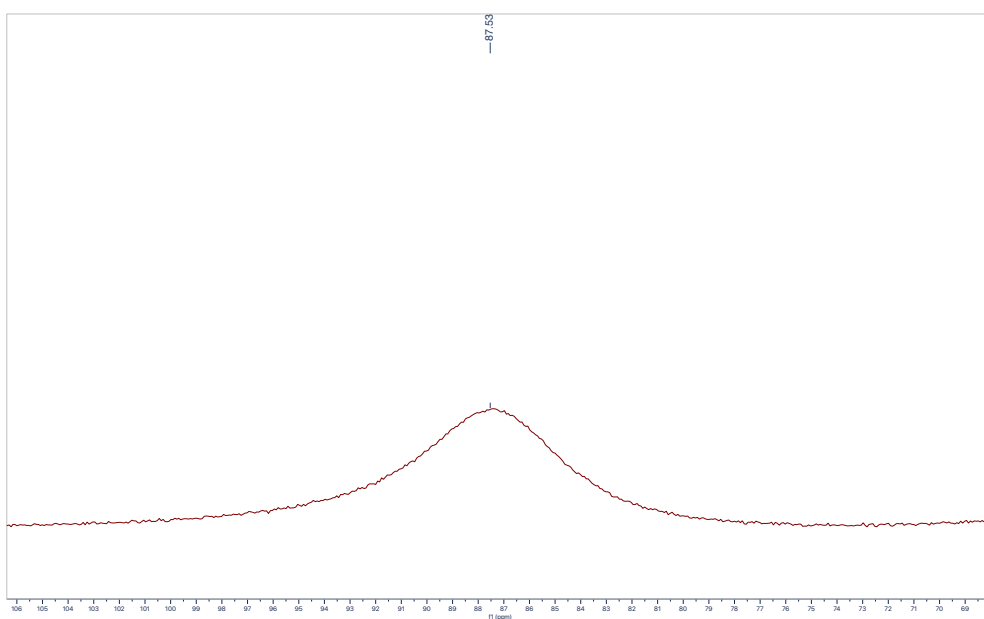

**Fig S12.**  $^{11}\text{B}$  NMR spectrum of complex **3** in PhMe- $\text{D}_8$  at 298 K.

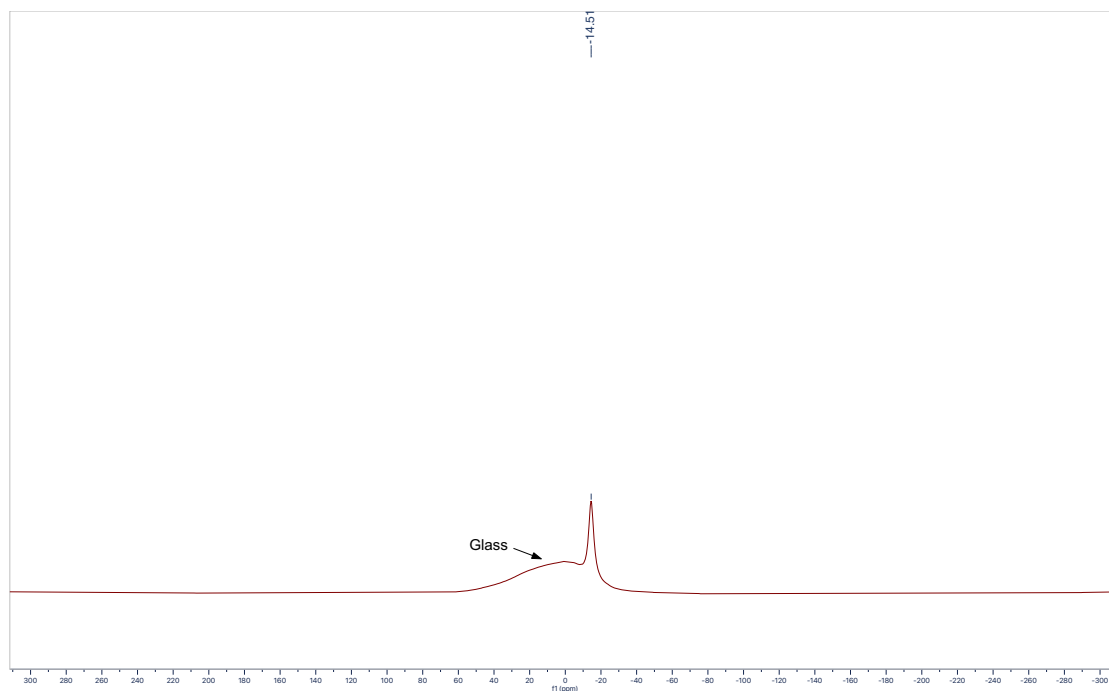

**Fig S13.**  $^{11}\text{B}$  NMR spectrum of complex **4** in  $\text{PhMe-D}_8$  at 209 K.

### S3. Van't Hoff Analysis

Using variable temperature  $^{31}\text{P}$  NMR spectra to calculate the thermodynamic parameters of the following equilibrium:

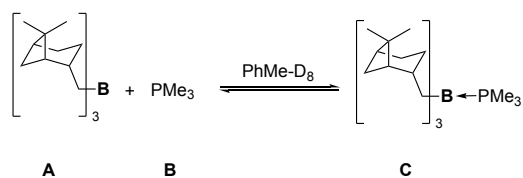

The equilibrium constant ( $K_{\text{eq}}$ ) was calculated according to **Equation 1**:

$$K_{\text{eq}} = \frac{[\text{C}]}{[\text{A}] [\text{B}]}$$

The concentrations of the species for broad peaks were calculated according to their relative populated states using **Equation 2**:

$$\delta_{\text{obs}} = \delta_{\text{B}} P_{\text{B}} + \delta_{\text{C}} (1 - P_{\text{B}})$$

A Van't Hoff plot of  $\ln(K_{\text{eq}})$  against  $1/T$  was constructed for the above reaction.  $\Delta S$  and  $\Delta H$  were calculated using the gradient and intercept of the plot according to **equation 3**:



$$\text{Ln}(K_{\text{eq}}) = \frac{-\Delta H}{R} \cdot \frac{1}{T} + \frac{\Delta S}{R}$$

$$y = m \cdot x + c$$

The free energy  $\Delta G$  was then calculated using **equation 4**:

$$\Delta G = \Delta H - T\Delta S$$

**Table S1.** Calculated concentrations, equilibrium constants and natural logs used for Fig S9.

| Temperature (K) | P <sub>[C]</sub> | P <sub>[B]</sub>        | K <sub>eq</sub> | Ln(K <sub>eq</sub> ) | 1/T      |
|-----------------|------------------|-------------------------|-----------------|----------------------|----------|
| 209.0           | 2.32E+09         | 1.71E+09                | 1.361           | 0.308                | 4.78E-03 |
| 233.0           | 3.41E+09         | 2.17E+09                | 1.572           | 0.452                | 4.29E-03 |
| 250.0           | 4.66E+09         | 5.08E+09                | 0.916           | -0.086               | 3.95E-03 |
| 258.0           |                  | 9.36E+09 <sup>[a]</sup> | 0.982           | -0.018               | 3.86E-03 |
| 263.0           |                  | 7.44E+09 <sup>[a]</sup> | 0.896           | -0.109               | 3.80E-03 |
| 268.0           |                  | 8.02E+09 <sup>[a]</sup> | 0.859           | -0.152               | 3.73E-03 |
| 273.0           |                  | 4.21E+09 <sup>[a]</sup> | 0.860           | -0.150               | 3.66E-03 |
| 283.0           |                  | 2.23E+09 <sup>[a]</sup> | 0.813           | -0.206               | 3.53E-03 |
| 301.9           |                  | 5.44E+09 <sup>[a]</sup> | 0.745           | -0.294               | 3.31E-03 |
| 332.6           |                  | 3.72E+09 <sup>[a]</sup> | 0.548           | -0.601               | 3.01E-03 |
| 358.0           |                  | 2.72E+09 <sup>[a]</sup> | 0.248           | -1.394               | 2.79E-03 |

<sup>[a]</sup> **Equation 2** used for these data points to determine relative populations of **B** and **C**, where  $\delta_B = -62.3$  ppm,  $\delta_C = -9.5$  ppm.<sup>[8]</sup>

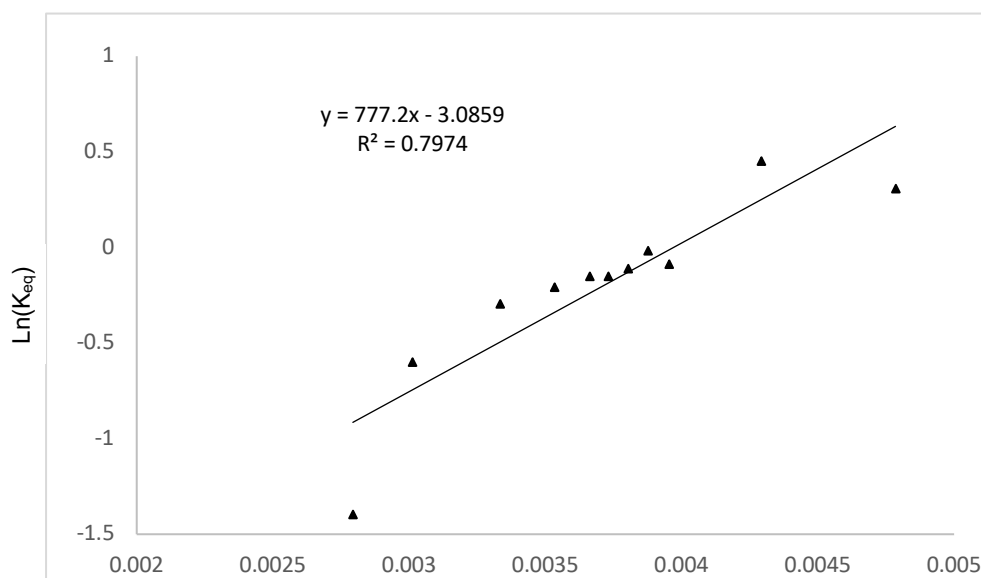

**Fig S14.** Van't Hoff plot of Ln(K<sub>eq</sub>) against 1/T.

1/T

**Table S2.** Calculated thermodynamic parameters of the association reaction of complex 4.

|                     |                                                    |                                                      |                                    |                                      |
|---------------------|----------------------------------------------------|------------------------------------------------------|------------------------------------|--------------------------------------|
| Gradient = 777.2    | $\Delta S$ (kJ mol <sup>-1</sup> K <sup>-1</sup> ) | $\Delta S$ (kcal mol <sup>-1</sup> K <sup>-1</sup> ) | $\Delta H$ (kJ mol <sup>-1</sup> ) | $\Delta H$ (kcal mol <sup>-1</sup> ) |
| Intercept = -3.0859 | -25.66E-03                                         | -6.14E-03                                            | -6.466                             | -1.55                                |

**Table S3.** Temperature dependence on free energy ( $\Delta G$ ) used to make Fig 7 in main text.

| Temperature (K) | $\Delta G$ |
|-----------------|------------|
| 209.0           | -0.267     |
| 233.0           | -0.119     |
| 250.0           | -0.015     |
| 258.0           | 0.003      |
| 263.0           | 0.034      |
| 268.0           | 0.065      |
| 273.0           | 0.096      |
| 283.0           | 0.126      |
| 301.9           | 0.188      |
| 332.6           | 0.292      |
| 358.0           | 0.372      |

Estimate of Error: The uncertainty in the integration was estimated to be 10% due to broadening. The VT apparatus indicated an uncertainty in the temperature of 1 °C.

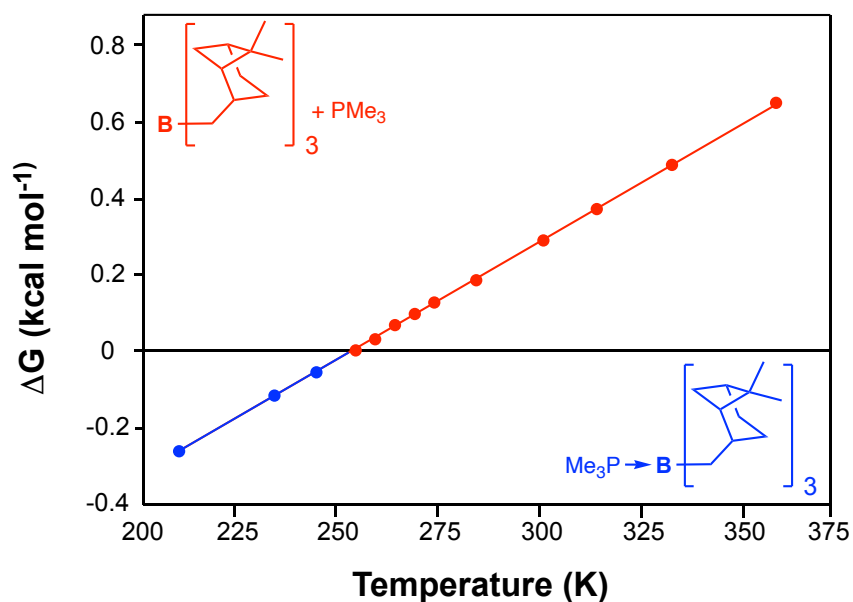**Figure S15.** Plot of free energy, (kcal mol<sup>-1</sup>) of association against temperature (K) for the formation of  $[\text{Me}_3\text{P}-\text{B}(\beta\text{-pinane})_3]$ .

## S4. Crystallographic Details

| Complex                                                                                | [B( $\beta$ -pinane) <sub>3</sub> ] (1) | [Me <sub>3</sub> P-B( $\beta$ -pinane) <sub>3</sub> ] (4) |
|----------------------------------------------------------------------------------------|-----------------------------------------|-----------------------------------------------------------|
| Chemical Formula                                                                       | C <sub>30</sub> H <sub>51</sub> B       | C <sub>33</sub> H <sub>60</sub> BP                        |
| F.w. (g mol <sup>-1</sup> )                                                            | 422.55                                  | 498.63                                                    |
| Crystal System                                                                         | Trigonal                                | Trigonal                                                  |
| a (Å)                                                                                  | 16.8436(6)                              | 18.5902(2)                                                |
| b (Å)                                                                                  | 16.8436(6)                              | 18.5902(2)                                                |
| c (Å)                                                                                  | 8.0192(4)                               | 7.7698(9)                                                 |
| a (°)                                                                                  | 90                                      | 90                                                        |
| b (°)                                                                                  | 90                                      | 90                                                        |
| g (°)                                                                                  | 120                                     | 120                                                       |
| V (Å <sup>3</sup> )                                                                    | 1970.30(17)                             | 2325.5(6)                                                 |
| Z                                                                                      | 3                                       | 3                                                         |
| F <sub>calc'd</sub> (g cm <sup>-3</sup> )                                              | 1.068                                   | 1.068                                                     |
| $\mu$ (mm <sup>-1</sup> )                                                              | 0.058                                   | 0.108                                                     |
| Reflns. collected                                                                      | 10930                                   | 5548                                                      |
| Uniq. Reflns.                                                                          | 2414                                    | 2144                                                      |
| <i>R</i> <sub>int</sub>                                                                | 0.0230                                  | 0.0195                                                    |
| <i>R</i> <sub>1</sub> and <i>wR</i> <sub>2</sub> [ <i>I</i> > 2 $\sigma$ ( <i>I</i> )] | 0.0302, 0.0823                          | 0.0251, 0.0608                                            |
| <i>R</i> <sub>1</sub> and <i>wR</i> <sub>2</sub> [all data]                            | 0.0309, 0.0827                          | 0.0258, 0.0614                                            |
| CCDC Number                                                                            | 2180015                                 | 2180016                                                   |

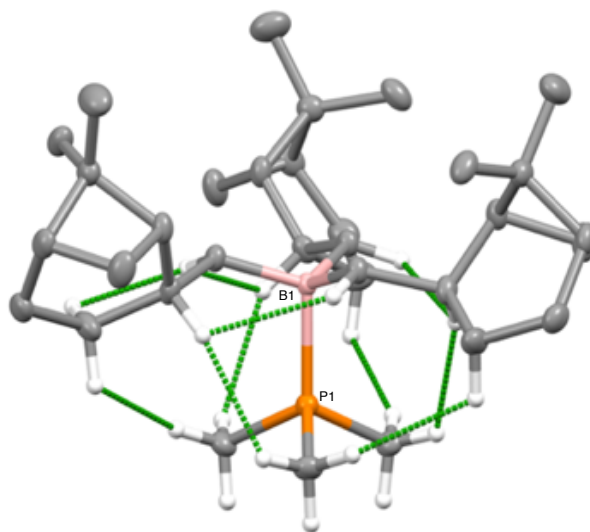

**Figure S16.** Molecular structure of complex [Me<sub>3</sub>P-B( $\beta$ -pinane)<sub>3</sub>] with inter-ligand H $\cdots$ H close contacts shown in green.

## S5. Computational Methods

The geometry optimizations of compounds **1-4** were performed with Gaussian16 (Revision C.01) program<sup>[4]</sup> using the PBE1PBE hybrid exchange functional<sup>[5a-c]</sup> and Def2-TZVP basis sets.<sup>[6a,b]</sup> In addition, Grimme's empirical dispersion correction with Becke-Johnson damping (D3BJ)<sup>[7]</sup> was used as well as an ultrafine integration grid. Full analytical frequency calculations were performed for the optimized structures to ensure the nature of the stationary points found (minima, no imaginary frequencies). For species **2** and **3**, 3 and 4 different organic ligand orientations respectively were considered to find the global minimum conformation. Here we report only the energetically most favoured structures: for **2**, the reported structure is at least 6.3 kcal/mol (Gibbs free energy) more stable than the other conformers and for **3** the value is 2.5 kcal/mol. The three structures **1-3** along with the species BH<sub>3</sub> and H<sub>2</sub>BR (R = pinane, camphane or sabinane) were optimized with and without dispersion correction to calculate the isodesmic exchange reaction and evaluate the effects of stabilizing dispersion effects brought about by the organic substituents. Finally, the association reaction of **1** + PMe<sub>3</sub> to form **4** was calculated at the same level of theory (results are given in the gas phase and at 298 K).

**Table S4.** Calculated  $\Delta E$  reaction energies of the heterolytic cleavage of a terpane ligand from H<sub>2</sub>B(terpane) (terpane =  $\beta$ -pinane, camphane, sabinane) to form B(terpane)<sub>3</sub> using PBE1PBE/Def2-TZVP basis set with and without Grimme's dispersion correction (D3BJ) applied (kcal mol<sup>-1</sup>).

|                            | $3 \text{ H}_2\text{BR} \longrightarrow \text{BR}_3 + 2 \text{ BH}_3$ |                             |                             |
|----------------------------|-----------------------------------------------------------------------|-----------------------------|-----------------------------|
|                            | [B( $\beta$ -pinane) <sub>3</sub> ]                                   | [B(camphane) <sub>3</sub> ] | [B(sabinane) <sub>3</sub> ] |
| $\Delta E$                 | 7.618                                                                 | 7.799                       | 7.649                       |
| $\Delta E_{(\text{D3BJ})}$ | -3.056                                                                | 1.055                       | 1.122                       |
| $\Delta G$                 | 9.791                                                                 | 10.320                      | 10.571                      |
| $\Delta G_{(\text{D3BJ})}$ | 1.415                                                                 | 3.715                       | 5.201                       |

### Optimized xyz-coordinates

#### **1 (with dispersion)**

82

```

C   -1.57095   -0.14444   -2.06808
H   -2.08357    0.79685   -1.85347
H   -1.75073   -0.32048   -3.14421
C   -2.22978   -1.28285   -1.28957
H   -1.72945   -2.21152   -1.58635
C   -3.73463   -1.43285   -1.62237
H   -4.06619   -0.51161   -2.10597
H   -3.85833   -2.21027   -2.38012
C   -4.65928   -1.72599   -0.41789
H   -5.52658   -1.05987   -0.45274
H   -5.05510   -2.74433   -0.48240
C   -3.95072   -1.58464    0.92110
H   -4.63998   -1.74781    1.75494
C   -2.65657   -2.41420    0.87080
H   -2.68092   -3.32584    0.26783
H   -2.25294   -2.65390    1.85332
C   -2.01132   -1.17731    0.21674
H   -0.95989   -0.97167    0.44125
C   -3.06647   -0.30967    0.97083
C   -2.59282   -0.00289    2.38612
H   -3.41757    0.39133    2.98721
H   -1.80534    0.75613    2.36577
H   -2.19413   -0.87688    2.90241
C   -3.61245    0.97593    0.37777
H   -4.01027    0.85913   -0.62792
H   -2.83968    1.74758    0.34563
H   -4.42127    1.35586    1.01025
B   -0.00149   -0.00280   -1.98528
C    0.90562   -1.29141   -2.06755

```

|   |          |          |          |
|---|----------|----------|----------|
| H | 0.34717  | -2.20535 | -1.84916 |
| H | 1.14483  | -1.36181 | -3.14422 |
| C | 2.22311  | -1.29135 | -1.29290 |
| H | 2.77691  | -0.39507 | -1.59431 |
| C | 3.10332  | -2.52143 | -1.62442 |
| H | 2.46904  | -3.27036 | -2.10324 |
| H | 3.83615  | -2.24315 | -2.38561 |
| C | 3.82293  | -3.17195 | -0.42004 |
| H | 3.67908  | -4.25616 | -0.45087 |
| H | 4.90262  | -3.00633 | -0.48853 |
| C | 3.35082  | -2.62419 | 0.91869  |
| H | 3.83915  | -3.13709 | 1.75263  |
| C | 3.42308  | -1.08891 | 0.86303  |
| H | 4.22314  | -0.65671 | 0.25611  |
| H | 3.43233  | -0.61632 | 1.84400  |
| C | 2.02716  | -1.14978 | 0.21354  |
| H | 1.32441  | -0.34098 | 0.43753  |
| C | 1.80486  | -2.49446 | 0.97321  |
| C | 1.30738  | -2.23206 | 2.38928  |
| H | 1.37975  | -3.14126 | 2.99348  |
| H | 0.25645  | -1.92890 | 2.37147  |
| H | 1.86720  | -1.44829 | 2.90084  |
| C | 0.96141  | -3.61167 | 0.38730  |
| H | 1.25758  | -3.90181 | -0.61838 |
| H | -0.09313 | -3.32762 | 0.35795  |
| H | 1.03841  | -4.49981 | 1.02281  |
| C | 0.66083  | 1.42713  | -2.06806 |
| H | 1.73203  | 1.40020  | -1.85204 |
| H | 0.59969  | 1.67025  | -3.14441 |
| C | 0.00381  | 2.56759  | -1.29108 |
| H | -1.05052 | 2.59775  | -1.58824 |
| C | 0.62609  | 3.94558  | -1.62556 |
| H | 1.59010  | 3.77168  | -2.10823 |
| H | 0.01498  | 4.44013  | -2.38441 |
| C | 0.83358  | 4.89475  | -0.42232 |
| H | 1.84396  | 5.31314  | -0.45721 |
| H | 0.14928  | 5.74636  | -0.48838 |
| C | 0.60135  | 4.21221  | 0.91754  |
| H | 0.80402  | 4.89193  | 1.75055  |
| C | -0.76371 | 3.50540  | 0.86764  |
| H | -1.54108 | 3.98108  | 0.26377  |
| H | -1.17337 | 3.27682  | 1.85030  |
| C | -0.01422 | 2.32768  | 0.21543  |
| H | -0.36123 | 1.31441  | 0.44126  |
| C | 1.26415  | 2.80948  | 0.96926  |
| C | 1.29301  | 2.24763  | 2.38528  |
| H | 2.04629  | 2.76602  | 2.98593  |
| H | 1.55740  | 1.18632  | 2.36623  |
| H | 0.33662  | 2.33915  | 2.90133  |
| C | 2.65100  | 2.63962  | 0.37712  |
| H | 2.74886  | 3.04002  | -0.62959 |
| H | 2.93415  | 1.58483  | 0.34791  |
| H | 3.38356  | 3.15258  | 1.00864  |

**1 (without dispersion)**

82

|   |          |          |          |
|---|----------|----------|----------|
| C | -1.45626 | 0.61178  | -1.61709 |
| H | -1.51548 | 1.57207  | -1.09460 |
| H | -1.52862 | 0.89749  | -2.68350 |
| C | -2.66670 | -0.25103 | -1.26318 |
| H | -2.52891 | -1.22243 | -1.75296 |
| C | -3.99388 | 0.35118  | -1.78916 |

|   |          |          |          |
|---|----------|----------|----------|
| H | -3.82929 | 1.41307  | -1.98526 |
| H | -4.22287 | -0.08303 | -2.76599 |
| C | -5.21288 | 0.19919  | -0.85010 |
| H | -5.75344 | 1.14950  | -0.79763 |
| H | -5.92041 | -0.52941 | -1.25913 |
| C | -4.82699 | -0.26013 | 0.54968  |
| H | -5.69854 | -0.29334 | 1.21088  |
| C | -3.96017 | -1.52567 | 0.42060  |
| H | -4.18564 | -2.19180 | -0.41663 |
| H | -3.91134 | -2.11564 | 1.33460  |
| C | -2.76751 | -0.56615 | 0.23080  |
| H | -1.79468 | -0.86978 | 0.63176  |
| C | -3.56520 | 0.48019  | 1.07499  |
| C | -3.35211 | 0.24018  | 2.56660  |
| H | -4.08819 | 0.80019  | 3.15159  |
| H | -2.35906 | 0.58707  | 2.86902  |
| H | -3.43475 | -0.80989 | 2.84915  |
| C | -3.43441 | 1.97475  | 0.83343  |
| H | -3.59485 | 2.27103  | -0.20098 |
| H | -2.44394 | 2.33132  | 1.13223  |
| H | -4.16546 | 2.51165  | 1.44699  |
| B | -0.00191 | 0.00058  | -1.52887 |
| C | 0.19560  | -1.56436 | -1.61797 |
| H | -0.60650 | -2.09541 | -1.09522 |
| H | -0.01675 | -1.76932 | -2.68427 |
| C | 1.54851  | -2.18139 | -1.26594 |
| H | 2.31970  | -1.57740 | -1.75894 |
| C | 1.68814  | -3.63318 | -1.78940 |
| H | 0.68539  | -4.02070 | -1.98262 |
| H | 2.17674  | -3.61689 | -2.76724 |
| C | 2.43006  | -4.61192 | -0.85008 |
| H | 1.87633  | -5.55444 | -0.79456 |
| H | 3.41360  | -4.86241 | -1.26075 |
| C | 2.63874  | -4.04570 | 0.54795  |
| H | 3.10377  | -4.78314 | 1.20960  |
| C | 3.30281  | -2.66339 | 0.41460  |
| H | 3.99026  | -2.52805 | -0.42481 |
| H | 3.79231  | -2.32479 | 1.32649  |
| C | 1.87573  | -2.10871 | 0.22721  |
| H | 1.65481  | -1.11325 | 0.62673  |
| C | 1.36874  | -3.32040 | 1.07470  |
| C | 1.47366  | -3.01300 | 2.56553  |
| H | 1.35833  | -3.92933 | 3.15261  |
| H | 0.67718  | -2.32613 | 2.86847  |
| H | 2.42482  | -2.55864 | 2.84515  |
| C | 0.00748  | -3.95253 | 0.83809  |
| H | -0.17208 | -4.24365 | -0.19470 |
| H | -0.79449 | -3.27008 | 1.13574  |
| H | -0.09258 | -4.85122 | 1.45574  |
| C | 1.25456  | 0.95383  | -1.62062 |
| H | 2.11761  | 0.52320  | -1.10238 |
| H | 1.53382  | 0.87564  | -2.68835 |
| C | 1.11377  | 2.43301  | -1.26399 |
| H | 0.20302  | 2.80078  | -1.75146 |
| C | 2.29847  | 3.28228  | -1.79034 |
| H | 3.13502  | 2.60898  | -1.99019 |
| H | 2.03492  | 3.70036  | -2.76549 |
| C | 2.77899  | 4.41150  | -0.84954 |
| H | 3.87232  | 4.40347  | -0.79873 |
| H | 2.50192  | 5.38970  | -1.25590 |
| C | 2.19044  | 4.30416  | 0.55082  |
| H | 2.59886  | 5.07390  | 1.21307  |

|   |         |         |          |
|---|---------|---------|----------|
| C | 0.66082 | 4.18767 | 0.42340  |
| H | 0.19619 | 4.71774 | -0.41247 |
| H | 0.12662 | 4.43924 | 1.33840  |
| C | 0.89388 | 2.67530 | 0.23075  |
| H | 0.14436 | 1.98479 | 0.63177  |
| C | 2.20043 | 2.84006 | 1.07281  |
| C | 1.88869 | 2.77253 | 2.56486  |
| H | 2.74294 | 3.12837 | 3.14903  |
| H | 1.69262 | 1.73855 | 2.86551  |
| H | 1.02139 | 3.36894 | 2.85028  |
| C | 3.42804 | 1.97900 | 0.82706  |
| H | 3.76465 | 1.97439 | -0.20744 |
| H | 3.24019 | 0.94178 | 1.12087  |
| H | 4.25911 | 2.33979 | 1.44212  |

**2 (with dispersion)**

82

|   |          |          |          |
|---|----------|----------|----------|
| B | -0.00084 | 0.00244  | -0.80232 |
| C | -2.49159 | 0.88150  | -0.49234 |
| C | -2.72690 | 0.61434  | 1.00348  |
| C | -2.38158 | 1.85578  | 1.83818  |
| C | -3.56883 | 2.80926  | 1.56251  |
| C | -4.37163 | 2.05136  | 0.50290  |
| C | -3.58076 | 1.96784  | -0.82948 |
| C | -4.48935 | 1.46564  | -1.94710 |
| C | -3.01277 | 3.31185  | -1.26696 |
| C | -4.25491 | 0.62541  | 1.05073  |
| C | 0.48254  | -2.59274 | -0.48791 |
| C | 0.81701  | -2.66396 | 1.01111  |
| C | -0.43793 | -2.98981 | 1.83334  |
| C | -0.66423 | -4.49483 | 1.55329  |
| C | 0.40460  | -4.80740 | 0.50358  |
| C | 0.09259  | -4.07964 | -0.83099 |
| C | 0.99374  | -4.61198 | -1.94063 |
| C | -1.35062 | -4.26203 | -1.28289 |
| C | 1.57382  | -3.99126 | 1.06394  |
| C | 2.00919  | 1.71702  | -0.48746 |
| C | 1.90198  | 2.04783  | 1.01030  |
| C | 2.80597  | 1.12246  | 1.83724  |
| C | 4.22525  | 1.67239  | 1.55843  |
| C | 3.96814  | 2.75212  | 0.50495  |
| C | 3.49421  | 2.11580  | -0.82842 |
| C | 3.51154  | 3.15829  | -1.94196 |
| C | 4.37047  | 0.95201  | -1.27376 |
| C | 2.67811  | 3.36385  | 1.06072  |
| C | 1.53936  | 0.32892  | -0.88561 |
| C | -0.48598 | -1.49433 | -0.88987 |
| C | -1.05413 | 1.17236  | -0.88627 |
| H | -2.79392 | -0.03063 | -1.01920 |
| H | -2.23976 | -0.29538 | 1.35918  |
| H | -2.31380 | 1.60001  | 2.89786  |
| H | -1.42138 | 2.29223  | 1.55827  |
| H | -3.25793 | 3.80419  | 1.24509  |
| H | -4.17957 | 2.93844  | 2.45958  |
| H | -5.38532 | 2.43514  | 0.36496  |
| H | -3.90573 | 1.24832  | -2.84706 |
| H | -5.24102 | 2.21578  | -2.21070 |
| H | -5.01256 | 0.54961  | -1.66388 |
| H | -2.56143 | 3.23581  | -2.25946 |
| H | -3.81078 | 4.05783  | -1.32695 |
| H | -2.24753 | 3.69598  | -0.59227 |
| H | -4.70655 | -0.13844 | 0.41466  |

|   |          |          |          |
|---|----------|----------|----------|
| H | -4.66212 | 0.52898  | 2.06060  |
| H | 1.42839  | -2.39648 | -1.00525 |
| H | 1.35592  | -1.78628 | 1.37305  |
| H | -0.26048 | -2.80451 | 2.89500  |
| H | -1.29481 | -2.37809 | 1.54654  |
| H | -1.67764 | -4.72458 | 1.22542  |
| H | -0.47846 | -5.08918 | 2.45142  |
| H | 0.58296  | -5.87658 | 0.36597  |
| H | 0.89809  | -3.99638 | -2.84044 |
| H | 0.72420  | -5.63797 | -2.20876 |
| H | 2.04579  | -4.60593 | -1.64695 |
| H | -1.50086 | -3.83412 | -2.27731 |
| H | -1.59568 | -5.32647 | -1.34466 |
| H | -2.07329 | -3.79168 | -0.61600 |
| H | 2.46734  | -3.99759 | 0.43653  |
| H | 1.85173  | -4.29643 | 2.07615  |
| H | 1.36990  | 2.43822  | -1.00915 |
| H | 0.87207  | 2.08118  | 1.37038  |
| H | 2.55489  | 1.18768  | 2.89820  |
| H | 2.70066  | 0.07405  | 1.55322  |
| H | 4.92842  | 0.90576  | 1.23418  |
| H | 4.64727  | 2.13133  | 2.45601  |
| H | 4.80809  | 3.43720  | 0.36691  |
| H | 3.02734  | 2.76609  | -2.84169 |
| H | 4.53660  | 3.43307  | -2.20835 |
| H | 2.98282  | 4.06943  | -1.65335 |
| H | 4.07659  | 0.60527  | -2.26772 |
| H | 5.41618  | 1.26789  | -1.33375 |
| H | 4.31946  | 0.09367  | -0.60365 |
| H | 2.24132  | 4.14072  | 0.43009  |
| H | 2.80285  | 3.75968  | 2.07201  |
| H | 2.12819  | -0.44813 | -0.39195 |
| H | 1.75556  | 0.16719  | -1.95715 |
| H | -1.45545 | -1.61897 | -0.40153 |
| H | -0.72732 | -1.59986 | -1.96305 |
| H | -0.67856 | 2.07077  | -0.39029 |
| H | -1.02022 | 1.44174  | -1.95745 |

## 2 (without dispersion)

82

|   |          |          |          |
|---|----------|----------|----------|
| B | 0.00004  | -0.00020 | -0.64071 |
| C | 2.67050  | -0.11968 | -0.43265 |
| C | 2.93257  | 0.22325  | 1.04587  |
| C | 3.02394  | -1.05105 | 1.89912  |
| C | 4.40832  | -1.63244 | 1.52051  |
| C | 4.87938  | -0.68878 | 0.40975  |
| C | 4.00272  | -0.85086 | -0.86223 |
| C | 4.64698  | -0.11937 | -2.03810 |
| C | 3.82170  | -2.30772 | -1.27527 |
| C | 4.39968  | 0.65102  | 0.97820  |
| C | -1.23169 | 2.37227  | -0.43331 |
| C | -1.66228 | 2.42732  | 1.04444  |
| C | -0.60488 | 3.14197  | 1.89971  |
| C | -0.79128 | 4.63196  | 1.52149  |
| C | -1.84256 | 4.56987  | 0.40937  |
| C | -1.26294 | 3.89195  | -0.86224 |
| C | -2.21715 | 4.08560  | -2.03920 |
| C | 0.09017  | 4.46307  | -1.27325 |
| C | -2.76496 | 3.48507  | 0.97586  |
| C | -1.43858 | -2.25320 | -0.43321 |
| C | -1.27240 | -2.65214 | 1.04527  |
| C | -2.42073 | -2.09259 | 1.89897  |



|   |          |          |          |
|---|----------|----------|----------|
| C | -3.61770 | -2.99918 | 1.52043  |
| C | -3.03734 | -3.87991 | 0.40979  |
| C | -2.73860 | -3.04050 | -0.86257 |
| C | -2.42802 | -3.96504 | -2.03811 |
| C | -3.90906 | -2.15457 | -1.27603 |
| C | -1.63727 | -4.13597 | 0.97789  |
| C | -1.38114 | -0.76158 | -0.73119 |
| C | 0.03150  | 1.57674  | -0.72954 |
| C | 1.35034  | -0.81574 | -0.73117 |
| H | 2.66070  | 0.83572  | -0.97038 |
| H | 2.23522  | 0.96233  | 1.44630  |
| H | 2.97481  | -0.80365 | 2.96224  |
| H | 2.20706  | -1.74800 | 1.70185  |
| H | 4.36865  | -2.67855 | 1.21698  |
| H | 5.09868  | -1.57450 | 2.36619  |
| H | 5.94807  | -0.76751 | 0.19426  |
| H | 3.96492  | -0.09015 | -2.89381 |
| H | 5.56252  | -0.62439 | -2.36147 |
| H | 4.90386  | 0.91224  | -1.78643 |
| H | 3.30803  | -2.37739 | -2.23782 |
| H | 4.79668  | -2.79077 | -1.39243 |
| H | 3.24514  | -2.89235 | -0.55777 |
| H | 4.56679  | 1.50527  | 0.31879  |
| H | 4.83517  | 0.87224  | 1.95653  |
| H | -2.05331 | 1.88650  | -0.97276 |
| H | -1.95531 | 1.45393  | 1.44385  |
| H | -0.79627 | 2.97541  | 2.96247  |
| H | 0.40701  | 2.78192  | 1.70372  |
| H | 0.13551  | 5.11973  | 1.21948  |
| H | -1.18721 | 5.20096  | 2.36684  |
| H | -2.30745 | 5.53537  | 0.19385  |
| H | -1.90107 | 3.48043  | -2.89486 |
| H | -2.23626 | 5.13116  | -2.36212 |
| H | -3.23953 | 3.79310  | -1.78880 |
| H | 0.40826  | 4.05362  | -2.23573 |
| H | 0.02186  | 5.54908  | -1.38965 |
| H | 0.88375  | 4.25494  | -0.55495 |
| H | -3.58766 | 3.20391  | 0.31510  |
| H | -3.17543 | 3.75139  | 1.95376  |
| H | -0.60652 | -2.72238 | -0.97141 |
| H | -0.28328 | -2.41893 | 1.44539  |
| H | -2.18179 | -2.17421 | 2.96202  |
| H | -2.61445 | -1.03635 | 1.70189  |
| H | -4.50311 | -2.44062 | 1.21692  |
| H | -3.91350 | -3.62557 | 2.36616  |
| H | -3.64098 | -4.76540 | 0.19469  |
| H | -2.06090 | -3.38972 | -2.89399 |
| H | -3.32365 | -4.50459 | -2.36144 |
| H | -1.66391 | -4.70403 | -1.78601 |
| H | -3.71237 | -1.67579 | -2.23901 |
| H | -4.81544 | -2.75669 | -1.39249 |
| H | -4.12621 | -1.36215 | -0.55915 |
| H | -0.98188 | -4.70868 | 0.31838  |
| H | -1.66370 | -4.62357 | 1.95629  |
| H | -2.15515 | -0.21480 | -0.18445 |
| H | -1.66224 | -0.59529 | -1.78733 |
| H | 0.89110  | 1.97277  | -0.18073 |
| H | 0.31837  | 1.73789  | -1.78494 |
| H | 1.26359  | -1.75952 | -0.18469 |
| H | 1.34737  | -1.14205 | -1.78738 |

**3 (with dispersion)**

82

|   |          |          |          |
|---|----------|----------|----------|
| C | 1.25148  | -0.99471 | 0.30242  |
| C | 1.49082  | -0.89262 | -1.20905 |
| C | 2.56070  | -1.93161 | -1.46220 |
| C | 2.40569  | -3.27393 | -0.80648 |
| C | 3.27370  | -2.22584 | -0.17393 |
| C | 2.59876  | -1.39477 | 0.90303  |
| C | 0.22071  | -1.02655 | -2.05042 |
| B | -0.82621 | 0.14083  | -1.88815 |
| C | -0.34095 | 1.62685  | -2.11491 |
| C | -1.09442 | 2.74078  | -1.39058 |
| C | -0.60058 | 4.14810  | -1.76684 |
| C | 0.55260  | 4.45305  | -0.80425 |
| C | 0.22475  | 3.68398  | 0.46108  |
| C | -0.81776 | 2.66204  | 0.09529  |
| C | -1.18490 | 3.83653  | 0.95235  |
| C | 1.31018  | 3.39153  | 1.47180  |
| C | 1.76905  | 4.66222  | 2.17511  |
| C | 4.76776  | -2.44677 | -0.12523 |
| C | 5.17064  | -3.24824 | 1.10546  |
| C | -2.36544 | -0.09271 | -1.65991 |
| C | -2.92160 | -1.50691 | -1.52198 |
| C | -2.49364 | -2.11739 | -0.20606 |
| C | -3.59801 | -1.95193 | 0.80320  |
| C | -4.76939 | -1.33094 | 0.06407  |
| C | -4.45695 | -1.51871 | -1.42468 |
| C | -3.22562 | -3.32008 | 0.30877  |
| C | -3.35096 | -1.50061 | 2.23177  |
| C | -2.82113 | -0.07081 | 2.26604  |
| C | -2.41513 | -2.40951 | 3.01419  |
| C | 2.49204  | 2.65080  | 0.85998  |
| C | 5.54572  | -1.14012 | -0.21139 |
| H | -2.59007 | -2.11120 | -2.37433 |
| H | -4.91074 | -0.74529 | -2.04806 |
| H | -4.85078 | -2.47553 | -1.77488 |
| H | -4.83168 | -0.26667 | 0.31002  |
| H | -5.72634 | -1.77933 | 0.34809  |
| H | -3.91020 | -3.84585 | -0.34712 |
| H | -2.67687 | -3.96797 | 0.97924  |
| H | -1.46286 | -1.99762 | 0.10200  |
| H | 1.94762  | 0.08313  | -1.41580 |
| H | 1.45798  | -3.53954 | -0.35175 |
| H | 2.91666  | -4.10662 | -1.27580 |
| H | 3.11139  | -1.88546 | -2.39619 |
| H | 0.85424  | -0.06934 | 0.72651  |
| H | 2.48894  | -1.92757 | 1.85187  |
| H | 0.51068  | -1.77261 | 0.50253  |
| H | -2.16438 | 2.64960  | -1.60518 |
| H | -0.29687 | 4.20700  | -2.81417 |
| H | -1.40382 | 4.87614  | -1.63109 |
| H | 1.49728  | 4.08540  | -1.21526 |
| H | 0.67306  | 5.52664  | -0.63386 |
| H | -1.81882 | 4.61411  | 0.54154  |
| H | -1.35493 | 3.63614  | 2.00418  |
| H | -0.80811 | 1.68448  | 0.56561  |
| H | -2.25040 | -2.00911 | 4.01733  |
| H | -2.81800 | -3.41816 | 3.11979  |
| H | -1.43613 | -2.48268 | 2.52934  |
| H | -2.75616 | 0.29908  | 3.29240  |
| H | -1.81732 | -0.03261 | 1.83340  |
| H | -3.45128 | 0.62096  | 1.70380  |
| H | -4.32402 | -1.51391 | 2.74123  |

|   |          |          |          |
|---|----------|----------|----------|
| H | 5.02299  | -3.04169 | -1.01165 |
| H | 6.24022  | -3.47303 | 1.09781  |
| H | 4.95788  | -2.68885 | 2.02108  |
| H | 4.62377  | -4.19287 | 1.15594  |
| H | 6.61889  | -1.33155 | -0.28876 |
| H | 5.24126  | -0.55625 | -1.08357 |
| H | 5.38904  | -0.52236 | 0.67692  |
| H | 0.86091  | 2.73309  | 2.22684  |
| H | 2.50460  | 4.44010  | 2.95253  |
| H | 2.23633  | 5.35108  | 1.46545  |
| H | 0.92712  | 5.18079  | 2.63959  |
| H | 3.18521  | 2.31847  | 1.63683  |
| H | 2.16437  | 1.77203  | 0.30065  |
| H | 3.05430  | 3.29261  | 0.17670  |
| H | -0.21180 | -2.01953 | -1.89343 |
| H | 0.51714  | -0.99565 | -3.11204 |
| H | 0.73536  | 1.74265  | -1.94452 |
| H | -0.46689 | 1.76494  | -3.20338 |
| H | -2.87183 | 0.42079  | -2.49324 |
| H | -2.66503 | 0.50070  | -0.78374 |
| H | 3.20048  | -0.50198 | 1.09943  |

### 3 (without dispersion)

82

|   |          |          |          |
|---|----------|----------|----------|
| C | 2.35812  | 0.09513  | 0.71373  |
| C | 2.43721  | -0.22422 | -0.78759 |
| C | 3.77400  | -0.92661 | -0.92206 |
| C | 4.10783  | -1.99200 | 0.08395  |
| C | 4.63643  | -0.59808 | 0.26364  |
| C | 3.80543  | 0.28949  | 1.17486  |
| C | 1.23905  | -1.00549 | -1.31400 |
| B | -0.15512 | -0.29348 | -1.50104 |
| C | -0.20389 | 1.27501  | -1.67703 |
| C | -1.54918 | 1.98526  | -1.82577 |
| C | -1.40840 | 3.45873  | -2.25581 |
| C | -1.31175 | 4.26896  | -0.95763 |
| C | -2.10468 | 3.47428  | 0.06324  |
| C | -2.26610 | 2.08359  | -0.49342 |
| C | -3.45120 | 3.00095  | -0.40349 |
| C | -1.90991 | 3.72777  | 1.54350  |
| C | -2.36077 | 5.13168  | 1.93068  |
| C | 6.12645  | -0.36544 | 0.13106  |
| C | 6.85232  | -0.62474 | 1.44612  |
| C | -1.45522 | -1.15200 | -1.74625 |
| C | -1.43837 | -2.65447 | -1.46981 |
| C | -1.43821 | -2.93735 | 0.02008  |
| C | -2.83118 | -3.30677 | 0.46593  |
| C | -3.69330 | -3.32830 | -0.78443 |
| C | -2.71175 | -3.37006 | -1.96085 |
| C | -1.73782 | -4.33682 | 0.47053  |
| C | -3.47702 | -2.80047 | 1.74683  |
| C | -3.72253 | -1.29530 | 1.68895  |
| C | -2.70802 | -3.14639 | 3.01444  |
| C | -0.48145 | 3.46596  | 2.00498  |
| C | 6.45686  | 1.01929  | -0.41368 |
| H | -0.55826 | -3.09399 | -1.95325 |
| H | -3.11931 | -2.90365 | -2.86063 |
| H | -2.48342 | -4.40587 | -2.22306 |
| H | -4.29934 | -2.41800 | -0.82416 |
| H | -4.38942 | -4.17316 | -0.79506 |
| H | -1.76027 | -5.13399 | -0.26448 |
| H | -1.33025 | -4.63591 | 1.42723  |

|   |          |          |          |
|---|----------|----------|----------|
| H | -0.80103 | -2.33477 | 0.65976  |
| H | 2.51859  | 0.72194  | -1.33855 |
| H | 3.33256  | -2.36579 | 0.74363  |
| H | 4.82344  | -2.74629 | -0.22338 |
| H | 4.21159  | -1.01450 | -1.91186 |
| H | 1.73320  | 0.96515  | 0.92574  |
| H | 3.93617  | 0.05864  | 2.23638  |
| H | 1.90253  | -0.74952 | 1.24000  |
| H | -2.15620 | 1.44428  | -2.56092 |
| H | -0.54592 | 3.61242  | -2.90842 |
| H | -2.28839 | 3.76944  | -2.82425 |
| H | -0.26977 | 4.34199  | -0.63035 |
| H | -1.67903 | 5.29154  | -1.08516 |
| H | -3.87932 | 3.40056  | -1.31611 |
| H | -4.18148 | 2.78322  | 0.36791  |
| H | -2.24239 | 1.22751  | 0.17279  |
| H | -3.21106 | -2.72380 | 3.88772  |
| H | -2.63181 | -4.22462 | 3.16563  |
| H | -1.69416 | -2.73373 | 2.99281  |
| H | -4.29386 | -0.96021 | 2.55861  |
| H | -2.77150 | -0.75427 | 1.68748  |
| H | -4.27648 | -0.99864 | 0.79604  |
| H | -4.45562 | -3.29542 | 1.81656  |
| H | 6.48947  | -1.09987 | -0.59988 |
| H | 7.93488  | -0.53475 | 1.32312  |
| H | 6.54724  | 0.09614  | 2.21037  |
| H | 6.63572  | -1.62629 | 1.82591  |
| H | 7.52898  | 1.11409  | -0.60479 |
| H | 5.92857  | 1.21367  | -1.35056 |
| H | 6.18383  | 1.80533  | 0.29572  |
| H | -2.55864 | 3.01358  | 2.06736  |
| H | -2.29936 | 5.28102  | 3.01188  |
| H | -1.72983 | 5.88972  | 1.45734  |
| H | -3.39255 | 5.31449  | 1.62051  |
| H | -0.40141 | 3.56518  | 3.09064  |
| H | -0.15635 | 2.45794  | 1.73539  |
| H | 0.22117  | 4.17719  | 1.56201  |
| H | 1.14216  | -1.94410 | -0.75548 |
| H | 1.46084  | -1.34487 | -2.34349 |
| H | 0.38644  | 1.75942  | -0.88768 |
| H | 0.39675  | 1.45324  | -2.58630 |
| H | -1.67071 | -0.98803 | -2.81737 |
| H | -2.31510 | -0.68847 | -1.24550 |
| H | 4.10607  | 1.33274  | 1.03318  |

**BH<sub>3</sub> (with dispersion)**

4

|   |          |          |          |
|---|----------|----------|----------|
| B | -0.00044 | -0.00003 | 0.00041  |
| H | 0.56287  | -1.05232 | -0.00068 |
| H | 0.63214  | 1.01248  | -0.00068 |
| H | -1.19282 | 0.04000  | -0.00068 |

**BH<sub>3</sub> (without dispersion)**

4

|   |          |          |          |
|---|----------|----------|----------|
| B | -0.00044 | -0.00003 | 0.00041  |
| H | 0.56335  | -1.05206 | -0.00068 |
| H | 0.63167  | 1.01276  | -0.00067 |
| H | -1.19283 | 0.03945  | -0.00068 |

**H<sub>2</sub>B(pinane) (with dispersion)**

30

|   |         |          |          |
|---|---------|----------|----------|
| B | 3.20407 | -1.13639 | -0.40748 |
|---|---------|----------|----------|

|   |          |          |          |
|---|----------|----------|----------|
| H | 3.21763  | -1.13237 | -1.60764 |
| C | 2.33044  | -0.13743 | 0.38847  |
| H | 3.09315  | 0.61405  | 0.68147  |
| H | 2.00512  | -0.54854 | 1.35000  |
| C | 1.19211  | 0.56204  | -0.34807 |
| H | 1.62424  | 0.97037  | -1.27008 |
| C | 0.58558  | 1.73364  | 0.46251  |
| H | 0.90273  | 1.62508  | 1.50213  |
| H | 1.03425  | 2.67167  | 0.12718  |
| C | -0.95592 | 1.84846  | 0.42014  |
| H | -1.25395 | 2.74659  | -0.12953 |
| H | -1.34150 | 1.97221  | 1.43657  |
| C | -1.61913 | 0.65167  | -0.24372 |
| H | -2.70946 | 0.73761  | -0.21904 |
| C | -0.93575 | 0.40930  | -1.60082 |
| H | -0.56524 | 1.29143  | -2.12937 |
| H | -1.53199 | -0.18830 | -2.28810 |
| C | 0.10803  | -0.40618 | -0.81419 |
| H | 0.55528  | -1.27813 | -1.30400 |
| C | -1.00431 | -0.68979 | 0.24115  |
| C | -0.67426 | -0.85336 | 1.71327  |
| H | -0.09542 | -0.02984 | 2.12661  |
| H | -1.59977 | -0.92860 | 2.29287  |
| H | -0.11255 | -1.77657 | 1.88350  |
| C | -1.85423 | -1.88251 | -0.17830 |
| H | -2.76838 | -1.92829 | 0.42106  |
| H | -2.14692 | -1.84962 | -1.22817 |
| H | -1.30556 | -2.81520 | -0.01636 |
| H | 3.94262  | -1.88668 | 0.16579  |

**H<sub>2</sub>B(pinane) (without dispersion)**

30

|   |          |          |          |
|---|----------|----------|----------|
| B | 3.23151  | -1.13746 | -0.40646 |
| H | 3.26105  | -1.11909 | -1.60634 |
| C | 2.33885  | -0.15672 | 0.39228  |
| H | 3.09789  | 0.59647  | 0.69347  |
| H | 2.01487  | -0.57740 | 1.35048  |
| C | 1.19892  | 0.54748  | -0.34036 |
| H | 1.63144  | 0.95578  | -1.26257 |
| C | 0.60002  | 1.72186  | 0.47376  |
| H | 0.90347  | 1.60045  | 1.51631  |
| H | 1.06623  | 2.65660  | 0.15210  |
| C | -0.93980 | 1.85878  | 0.41438  |
| H | -1.21937 | 2.75813  | -0.14360 |
| H | -1.33400 | 1.99566  | 1.42613  |
| C | -1.61444 | 0.66732  | -0.25080 |
| H | -2.70396 | 0.76848  | -0.23372 |
| C | -0.92561 | 0.41428  | -1.60381 |
| H | -0.54273 | 1.29115  | -2.13284 |
| H | -1.52458 | -0.17776 | -2.29395 |
| C | 0.10513  | -0.41221 | -0.80933 |
| H | 0.54543  | -1.28935 | -1.29681 |
| C | -1.02055 | -0.68373 | 0.23874  |
| C | -0.70629 | -0.85683 | 1.71488  |
| H | -0.11852 | -0.04427 | 2.13797  |
| H | -1.63808 | -0.92031 | 2.28633  |
| H | -0.16115 | -1.78972 | 1.88806  |
| C | -1.88392 | -1.86608 | -0.18898 |
| H | -2.80349 | -1.90028 | 0.40326  |
| H | -2.16888 | -1.83046 | -1.24104 |
| H | -1.35007 | -2.80683 | -0.02274 |
| H | 3.97297  | -1.88491 | 0.16729  |

**H<sub>2</sub>B(camphane) (with dispersion)**

30

|   |          |          |          |
|---|----------|----------|----------|
| C | -1.07163 | -0.96913 | -1.31877 |
| C | 0.29733  | -1.21942 | -0.68677 |
| C | 0.76990  | 0.22469  | -0.45545 |
| C | -0.53937 | 0.95637  | 0.02070  |
| C | -1.59965 | -0.16707 | -0.12478 |
| C | -1.44444 | -1.20864 | 0.98629  |
| C | -0.09252 | -1.88054 | 0.64264  |
| C | 2.01943  | 0.36316  | 0.39855  |
| B | 3.34583  | -0.16969 | -0.19400 |
| H | 3.47457  | -0.32836 | -1.37666 |
| C | -0.86569 | 2.11063  | -0.92215 |
| C | -0.46337 | 1.52395  | 1.43205  |
| H | 4.29535  | -0.35914 | 0.51266  |
| H | 1.02374  | 0.62740  | -1.44327 |
| H | 1.00396  | -1.80472 | -1.27974 |
| H | -0.20769 | -2.95910 | 0.51461  |
| H | 0.65994  | -1.73501 | 1.41998  |
| H | -1.47230 | -0.78336 | 1.98911  |
| H | -2.26255 | -1.93063 | 0.92580  |
| H | -2.61514 | 0.22536  | -0.21710 |
| H | -0.04511 | 2.83443  | -0.94127 |
| H | -1.76765 | 2.63868  | -0.59867 |
| H | -1.02588 | 1.76678  | -1.94621 |
| H | 0.22104  | 2.37547  | 1.47010  |
| H | -1.44760 | 1.88165  | 1.74829  |
| H | -0.12086 | 0.79932  | 2.17088  |
| H | -1.01516 | -0.40314 | -2.25042 |
| H | -1.64310 | -1.88381 | -1.49638 |
| H | 1.87377  | 0.04520  | 1.43475  |
| H | 2.28163  | 1.43744  | 0.49960  |

**H<sub>2</sub>B(camphane) (without dispersion)**

30

|   |          |          |          |
|---|----------|----------|----------|
| C | -1.08653 | -0.95280 | -1.32126 |
| C | 0.27616  | -1.22923 | -0.68472 |
| C | 0.77612  | 0.20731  | -0.45113 |
| C | -0.52322 | 0.96477  | 0.02114  |
| C | -1.60357 | -0.14137 | -0.12776 |
| C | -1.47193 | -1.18813 | 0.98312  |
| C | -0.13264 | -1.88761 | 0.64148  |
| C | 2.02990  | 0.32498  | 0.40308  |
| B | 3.35783  | -0.20184 | -0.19334 |
| H | 3.49310  | -0.34353 | -1.37754 |
| C | -0.82752 | 2.12542  | -0.92421 |
| C | -0.44329 | 1.53543  | 1.43280  |
| H | 4.30508  | -0.39915 | 0.51457  |
| H | 1.03842  | 0.60475  | -1.43924 |
| H | 0.97308  | -1.82755 | -1.27681 |
| H | -0.27062 | -2.96314 | 0.50767  |
| H | 0.61973  | -1.76336 | 1.42297  |
| H | -1.49388 | -0.76438 | 1.98711  |
| H | -2.30489 | -1.89320 | 0.92013  |
| H | -2.61212 | 0.26877  | -0.22325 |
| H | 0.00420  | 2.83680  | -0.94119 |
| H | -1.72162 | 2.66886  | -0.60356 |
| H | -0.99084 | 1.78591  | -1.94946 |
| H | 0.25474  | 2.37616  | 1.47190  |
| H | -1.42246 | 1.91169  | 1.74418  |
| H | -0.11648 | 0.80839  | 2.17679  |

|   |          |          |          |
|---|----------|----------|----------|
| H | -1.01764 | -0.38856 | -2.25343 |
| H | -1.67429 | -1.85706 | -1.50102 |
| H | 1.88412  | -0.00129 | 1.43701  |
| H | 2.30241  | 1.39645  | 0.51478  |

**H<sub>2</sub>B(sabinane) (with dispersion)**

30

|   |          |          |          |
|---|----------|----------|----------|
| B | 3.14846  | 1.57812  | 0.46683  |
| H | 3.51462  | 2.64954  | 0.07286  |
| C | 2.38976  | 0.61940  | -0.48396 |
| H | 1.68755  | 1.17273  | -1.12154 |
| H | 3.18598  | 0.31544  | -1.19181 |
| C | 1.72809  | -0.61861 | 0.11455  |
| H | 2.48112  | -1.17759 | 0.68143  |
| C | 1.07152  | -1.51494 | -0.94776 |
| H | 1.02688  | -2.54712 | -0.59347 |
| H | 1.63965  | -1.52776 | -1.88048 |
| C | -0.34587 | -0.95950 | -1.13125 |
| H | -1.04730 | -1.72801 | -1.46752 |
| H | -0.35100 | -0.16874 | -1.88758 |
| C | -0.71526 | -0.36968 | 0.21678  |
| C | -0.42963 | -1.25701 | 1.39238  |
| H | -0.19083 | -2.30261 | 1.23493  |
| H | -1.00097 | -1.06500 | 2.29328  |
| C | 0.56504  | -0.20803 | 0.99091  |
| H | 0.69887  | 0.63945  | 1.65650  |
| C | -1.83967 | 0.63490  | 0.32057  |
| H | -1.90074 | 0.92491  | 1.37742  |
| C | -1.56349 | 1.89781  | -0.48444 |
| H | -0.60390 | 2.34127  | -0.20745 |
| H | -2.34258 | 2.64490  | -0.31392 |
| H | -1.54165 | 1.69085  | -1.55779 |
| C | -3.17435 | 0.01396  | -0.06985 |
| H | -3.37778 | -0.88345 | 0.51935  |
| H | -3.17688 | -0.27108 | -1.12586 |
| H | -3.99697 | 0.71688  | 0.08396  |
| H | 3.43689  | 1.25503  | 1.58594  |

**H<sub>2</sub>B(sabinane) (without dispersion)**

30

|   |          |          |          |
|---|----------|----------|----------|
| B | 3.22649  | 1.54120  | 0.47797  |
| H | 3.60965  | 2.61128  | 0.09579  |
| C | 2.42440  | 0.61883  | -0.47385 |
| H | 1.74270  | 1.19683  | -1.11137 |
| H | 3.21668  | 0.29676  | -1.17996 |
| C | 1.73030  | -0.60896 | 0.11176  |
| H | 2.46862  | -1.18123 | 0.68540  |
| C | 1.07266  | -1.49825 | -0.95854 |
| H | 1.03206  | -2.53370 | -0.61270 |
| H | 1.64012  | -1.50326 | -1.89206 |
| C | -0.34801 | -0.94780 | -1.13919 |
| H | -1.04566 | -1.71990 | -1.47642 |
| H | -0.35743 | -0.15683 | -1.89569 |
| C | -0.72013 | -0.35938 | 0.21015  |
| C | -0.42643 | -1.24417 | 1.38700  |
| H | -0.18185 | -2.28908 | 1.23177  |
| H | -0.99663 | -1.05454 | 2.28948  |
| C | 0.56313  | -0.19107 | 0.98193  |
| H | 0.69643  | 0.65666  | 1.64773  |
| C | -1.85842 | 0.63296  | 0.32022  |
| H | -1.90390 | 0.93494  | 1.37477  |
| C | -1.62252 | 1.89324  | -0.50370 |

|   |          |          |          |
|---|----------|----------|----------|
| H | -0.66503 | 2.35799  | -0.25514 |
| H | -2.41042 | 2.62818  | -0.31970 |
| H | -1.62473 | 1.67834  | -1.57588 |
| C | -3.19428 | -0.01030 | -0.03419 |
| H | -3.37665 | -0.90142 | 0.57148  |
| H | -3.21765 | -0.30998 | -1.08604 |
| H | -4.02153 | 0.68568  | 0.12780  |
| H | 3.53858  | 1.18668  | 1.58136  |

**4 (with dispersion)**

95

|   |          |          |          |
|---|----------|----------|----------|
| P | -0.00361 | -0.00276 | -2.75905 |
| B | -0.00139 | -0.00174 | -0.74683 |
| C | -1.47106 | 0.55735  | -0.30879 |
| H | -1.42629 | 0.72722  | 0.77428  |
| H | -1.62135 | 1.55815  | -0.73373 |
| C | -2.71865 | -0.28688 | -0.60847 |
| H | -2.51949 | -0.88778 | -1.50779 |
| C | -3.02920 | -1.31688 | 0.47647  |
| H | -2.12984 | -1.86111 | 0.76480  |
| C | -3.90663 | -0.77387 | 1.64623  |
| C | -5.10668 | -1.04648 | 0.70016  |
| H | -6.05407 | -1.33875 | 1.16358  |
| C | -5.30344 | 0.08792  | -0.29203 |
| H | -5.80963 | 0.92693  | 0.19512  |
| H | -5.98146 | -0.26308 | -1.07668 |
| C | -3.97315 | 0.57824  | -0.90780 |
| H | -3.77254 | 1.59035  | -0.55196 |
| H | -4.09441 | 0.68055  | -1.99035 |
| C | -4.25494 | -2.13428 | 0.02355  |
| H | -4.38700 | -2.25753 | -1.05526 |
| H | -4.33331 | -3.11014 | 0.50024  |
| C | -3.88669 | -1.74308 | 2.82166  |
| H | -4.66838 | -1.48542 | 3.54286  |
| H | -2.92513 | -1.68805 | 3.34078  |
| H | -4.04047 | -2.78023 | 2.52161  |
| C | -3.71491 | 0.62578  | 2.20127  |
| H | -4.53141 | 0.86255  | 2.89149  |
| H | -3.68662 | 1.40164  | 1.43968  |
| H | -2.78276 | 0.69079  | 2.76989  |
| C | 1.58927  | 0.39766  | -3.53233 |
| H | 2.34143  | -0.32691 | -3.21845 |
| H | 1.91305  | 1.38517  | -3.20283 |
| H | 1.50778  | 0.38581  | -4.62116 |
| C | 0.25016  | -1.55413 | -0.30952 |
| H | 0.08243  | -1.60060 | 0.77379  |
| H | -0.54211 | -2.18477 | -0.73309 |
| C | 1.60420  | -2.21317 | -0.61144 |
| H | 2.02149  | -1.74379 | -1.51429 |
| C | 2.65599  | -1.96258 | 0.46814  |
| H | 2.67814  | -0.91068 | 0.75274  |
| C | 2.63075  | -2.98998 | 1.64155  |
| C | 3.46288  | -3.89571 | 0.69455  |
| H | 4.19223  | -4.56806 | 1.15686  |
| C | 2.57534  | -4.63700 | -0.29183 |
| H | 2.10581  | -5.49494 | 0.19908  |
| H | 3.21548  | -5.04886 | -1.07874 |
| C | 1.48095  | -3.73338 | -0.90385 |
| H | 0.50688  | -4.06473 | -0.53975 |
| H | 1.44524  | -3.89399 | -1.98554 |
| C | 3.97525  | -2.61602 | 0.01150  |
| H | 4.14338  | -2.67226 | -1.06787 |



|   |          |          |          |
|---|----------|----------|----------|
| H | 4.86133  | -2.19382 | 0.48297  |
| C | 3.46611  | -2.48382 | 2.81097  |
| H | 3.63747  | -3.28709 | 3.53414  |
| H | 2.94036  | -1.67673 | 3.32993  |
| H | 4.43965  | -2.09958 | 2.50454  |
| C | 1.32570  | -3.52188 | 2.20521  |
| H | 1.53236  | -4.34438 | 2.89796  |
| H | 0.63607  | -3.88858 | 1.44843  |
| H | 0.80601  | -2.74474 | 2.77306  |
| C | -1.14826 | 1.17621  | -3.53079 |
| H | -0.89571 | 2.19009  | -3.21859 |
| H | -2.16478 | 0.96365  | -3.19885 |
| H | -1.09965 | 1.11059  | -4.61966 |
| C | 1.21710  | 0.99378  | -0.31226 |
| H | 1.34517  | 0.87007  | 0.77041  |
| H | 2.15897  | 0.62662  | -0.73981 |
| C | 1.10334  | 2.49620  | -0.61139 |
| H | 0.47474  | 2.62236  | -1.50495 |
| C | 0.37357  | 3.27754  | 0.48014  |
| H | -0.54297 | 2.76746  | 0.77657  |
| C | 1.29155  | 3.76848  | 1.64171  |
| C | 1.64258  | 4.94570  | 0.69296  |
| H | 1.86406  | 5.91283  | 1.15482  |
| C | 2.71553  | 4.55308  | -0.30942 |
| H | 3.69967  | 4.57547  | 0.16856  |
| H | 2.74041  | 5.31608  | -1.09415 |
| C | 2.47465  | 3.15506  | -0.92336 |
| H | 3.25688  | 2.47818  | -0.57516 |
| H | 2.61333  | 3.21011  | -2.00725 |
| C | 0.26920  | 4.74757  | 0.02874  |
| H | 0.21805  | 4.92379  | -1.04959 |
| H | -0.53424 | 5.30048  | 0.51298  |
| C | 0.45149  | 4.23237  | 2.82514  |
| H | 1.07019  | 4.78253  | 3.54077  |
| H | 0.02631  | 3.37040  | 3.34797  |
| H | -0.37491 | 4.88121  | 2.53280  |
| C | 2.41603  | 2.90602  | 2.18530  |
| H | 3.03447  | 3.49646  | 2.86944  |
| H | 3.06720  | 2.49596  | 1.41667  |
| H | 2.01473  | 2.06477  | 2.75773  |
| C | -0.45333 | -1.58368 | -3.52988 |
| H | -1.45659 | -1.87285 | -3.21517 |
| H | 0.24060  | -2.35695 | -3.19972 |
| H | -0.42340 | -1.50866 | -4.61881 |

**PMe<sub>3</sub> (with dispersion)**

13

|   |          |          |          |
|---|----------|----------|----------|
| P | 0.00003  | 0.00009  | -0.59704 |
| C | -0.13338 | -1.61293 | 0.27613  |
| C | -1.33036 | 0.92187  | 0.27620  |
| C | 1.46369  | 0.69092  | 0.27622  |
| H | 1.60574  | 1.73299  | -0.01795 |
| H | 1.35860  | 0.64109  | 1.36433  |
| H | 2.35853  | 0.13846  | -0.01821 |
| H | -1.29934 | 1.97313  | -0.01794 |
| H | -2.30376 | 0.52387  | -0.01826 |
| H | -1.23489 | 0.85540  | 1.36431  |
| H | 0.69803  | -2.25698 | -0.01812 |
| H | -0.12374 | -1.49679 | 1.36421  |
| H | -1.05930 | -2.11166 | -0.01810 |

## References

- [1] Zaidlewicz, M., Brown, H.C. and Neelamkavil, S.F. (2008). Borane-Tetrahydrofuran. In Encyclopedia of Reagents for Organic Synthesis. <https://doi.org/10.1002/047084289X.rb241.pub2>
- [2] H. Li, Y. L. Zhong, C. Y. Chen, A. E. Ferraro, D. Wang, *Org. Lett.* 2015, **17**, 3616–3619.
- [3] Impurity of suspected [O=P(OMe)(OH)<sub>2</sub>] from PMe<sub>3</sub> consistently at  $\delta = 5.70$  ppm was signal suppressed for clarity, using MNova's suppression processing option (Method = Convolution, Selectivity = 4).
- [4] Gaussian 16, Revision C.01, M. J. Frisch, G. W. Trucks, H. B. Schlegel, G. E. Scuseria, M. A. Robb, J. R. Cheeseman, G. Scalmani, V. Barone, G. A. Petersson, H. Nakatsuji, X. Li, M. Caricato, A. V. Marenich, J. Bloino, B. G. Janesko, R. Gomperts, B. Mennucci, H. P. Hratchian, J. V. Ortiz, A. F. Izmaylov, J. L. Sonnenberg, D. Williams-Young, F. Ding, F. Lipparini, F. Egidi, J. Goings, B. Peng, A. Petrone, T. Henderson, D. Ranasinghe, V. G. Zakrzewski, J. Gao, N. Rega, G. Zheng, W. Liang, M. Hada, M. Ehara, K. Toyota, R. Fukuda, J. Hasegawa, M. Ishida, T. Nakajima, Y. Honda, O. Kitao, H. Nakai, T. Vreven, K. Throssell, J. A. Montgomery, Jr., J. E. Peralta, F. Ogliaro, M. J. Bearpark, J. J. Heyd, E. N. Brothers, K. N. Kudin, V. N. Staroverov, T. A. Keith, R. Kobayashi, J. Normand, K. Raghavachari, A. P. Rendell, J. C. Burant, S. S. Iyengar, J. Tomasi, M. Cossi, J. M. Millam, M. Klene, C. Adamo, R. Cammi, J. W. Ochterski, R. L. Martin, K. Morokuma, O. Farkas, J. B. Foresman, and D. J. Fox, Gaussian, Inc., Wallingford CT, 2019.
- [5] a) J. P. Perdew, K. Burke, and M. Ernzerhof, *Phys. Rev. Lett.*, 1996, **77**, 3865-68. b) J. P. Perdew, K. Burke, and M. Ernzerhof, *Phys. Rev. Lett.*, 1997, **78**, 1396. c) C. Adamo and V. Barone, *J. Chem. Phys.*, 1999, **110**, 6158-69.
- [6] a) F. Weigend and R. Ahlrichs, *Phys. Chem. Chem. Phys.*, 2005, **7**, 3297-305. b) F. Weigend, *Phys. Chem. Chem. Phys.*, 2006, **8**, 1057-65.
- [7] S. Grimme, S. Ehrlich and L. Goerigk, *J. Comp. Chem.* 2011, **32**, 1456-65.
- [8] H. Günther, *The Physical Basis of the Nuclear Magnetic Resonance Experiment.*, Wiley-VCH, 2013
